# Supplementary material for: Synthesis of temporin L hydroxamate-based peptides and evaluation of their coordination properties with iron(iii )
Source: Royal Society of Chemistry journal article supplement (doi:10.1039/d2dt04099a), 2023-01-01
Supplement: d2dt04099a1.pdf [file d2dt04099a1.pdf]

*Supplementary information*

# Synthesis of temporin L hydroxamate-based peptides and evaluation of their coordination properties of iron (III)

*Rosa Bellavita,<sup>a</sup> Linda Leone,<sup>b</sup> Angela Maione,<sup>c</sup> Lucia Falcigno,<sup>a</sup> Gabriella D'Auria,<sup>a</sup> Francesco Merlino,<sup>a</sup> Paolo Grieco,<sup>a</sup> Flavia Nastri,<sup>b</sup> Emilia Galdiero,<sup>c</sup> Angela Lombardi,<sup>b</sup> Stefania Galdiero,<sup>a\*</sup> Annarita Falanga<sup>d\*</sup>*

<sup>a</sup>Department of Pharmacy, University of Naples "Federico II", Via Domenico Montesano 49, 80138 Naples, Italy

<sup>b</sup>Department of Chemical Sciences, University of Napoli "Federico II", Napoli, Italy.

<sup>c</sup>Department of Biology, University of Naples Federico II, Via Cinthia, 80126 Naples, Italy.

<sup>d</sup>Department of Agricultural Science, University of Naples "Federico II", via Università 100, 80055, Portici, Italy

## Table of contents

|                                                                                                                            |     |
|----------------------------------------------------------------------------------------------------------------------------|-----|
| 1. HPLC chromatograms and HRMS of peptides Pep-cyc1, Pep-cyc2, and Pep-cyc3 (Figures S1-S3)                                | 1-2 |
| 2. UV-Vis spectra of peptide Pep-cyc (Figure S4)                                                                           | 3   |
| 3. UV-Vis spectra of peptide Pep-cyc and its linear analogue acquired during the titration of Fe <sup>3+</sup> (Figure S5) | 4   |

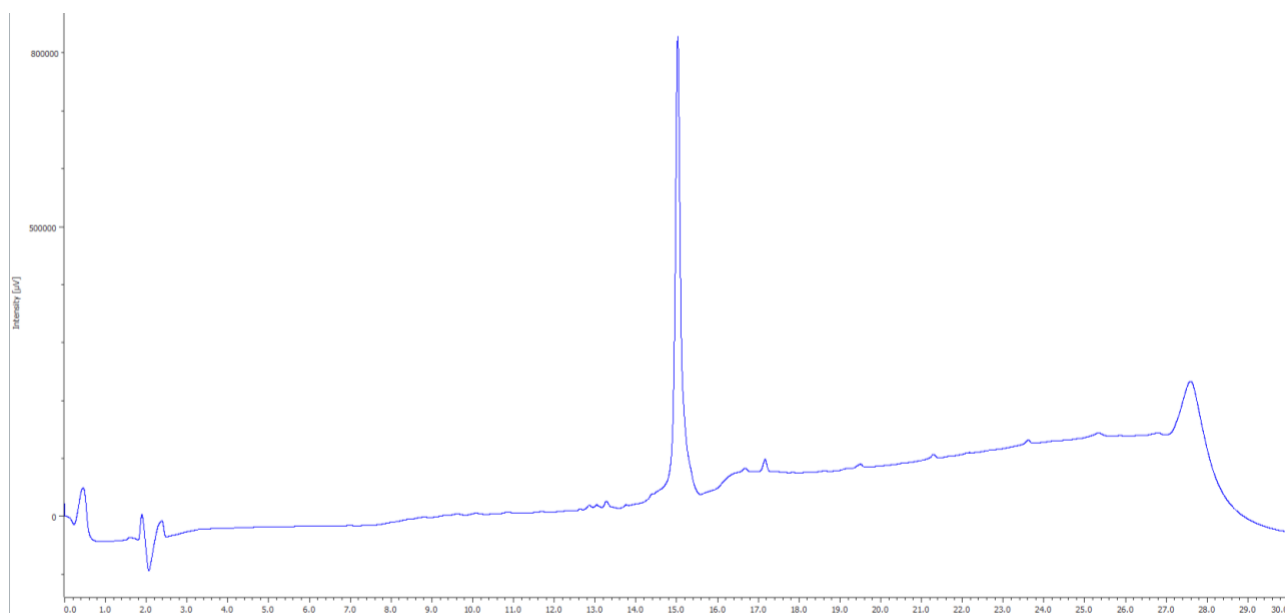

**Figure S1.** Chromatogram of peptide **Pep-cyc1** obtained by an analytical HPLC (Jasco LC-NetII/ADC) equipped with a Phenomenex Kinetex C18 column (150 mm × 4.6 mm, 5 μm, 100 Å), and monitored by UV detection at 220 nm. [linear gradient 10-90% MeCN (0.1% TFA) in H<sub>2</sub>O (0.1% TFA) over 20 min, flow rate of 1 mL/min]. Calculated mass: 1833.2671, Found mass:  $[M+2H]^+/2=917.5502$ ,  $[M+3H]^+/3=612.0363$ .

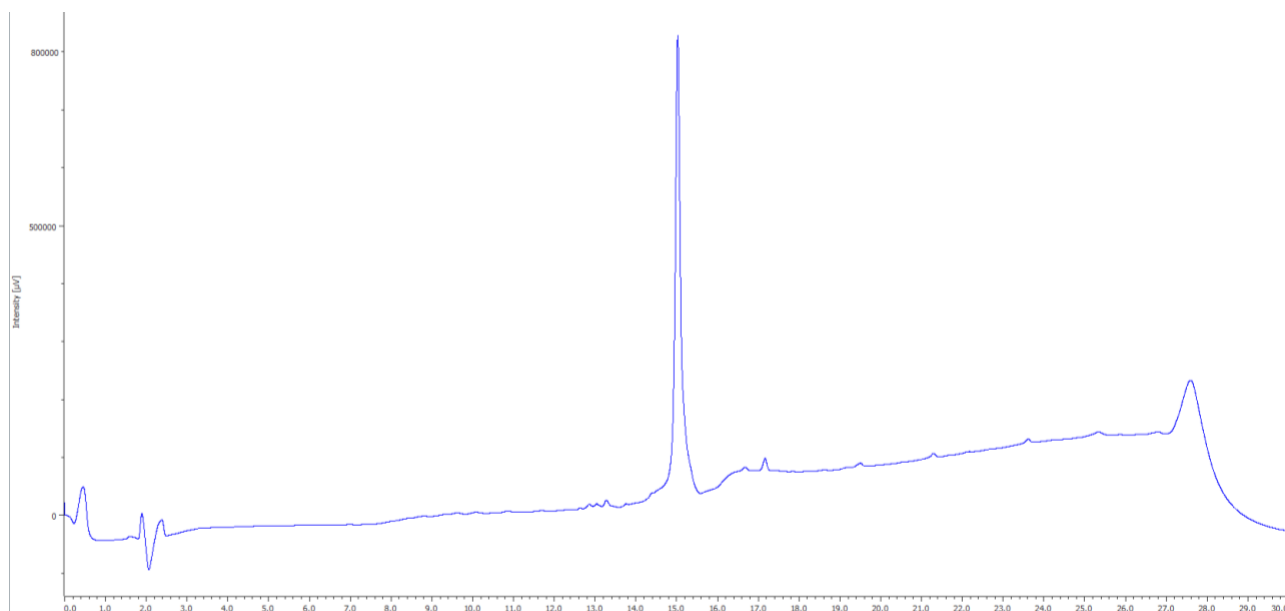

**Figure S2.** Chromatogram of peptide **Pep-cyc2** obtained by an analytical HPLC (Jasco LC-NetII/ADC) equipped with a Phenomenex Kinetex C18 column (150 mm × 4.6 mm, 5 μm, 100 Å), and monitored by UV detection at 220 nm. [linear gradient 10-90% MeCN (0.1% TFA) in H<sub>2</sub>O (0.1% TFA) over 20 min, flow rate of 1 mL/min]. Calculated mass: 1918.3716. Found mass:  $[M+2H]^+/2=960.0773$ ,  $[M+3H]^+/3=640.3872$ .

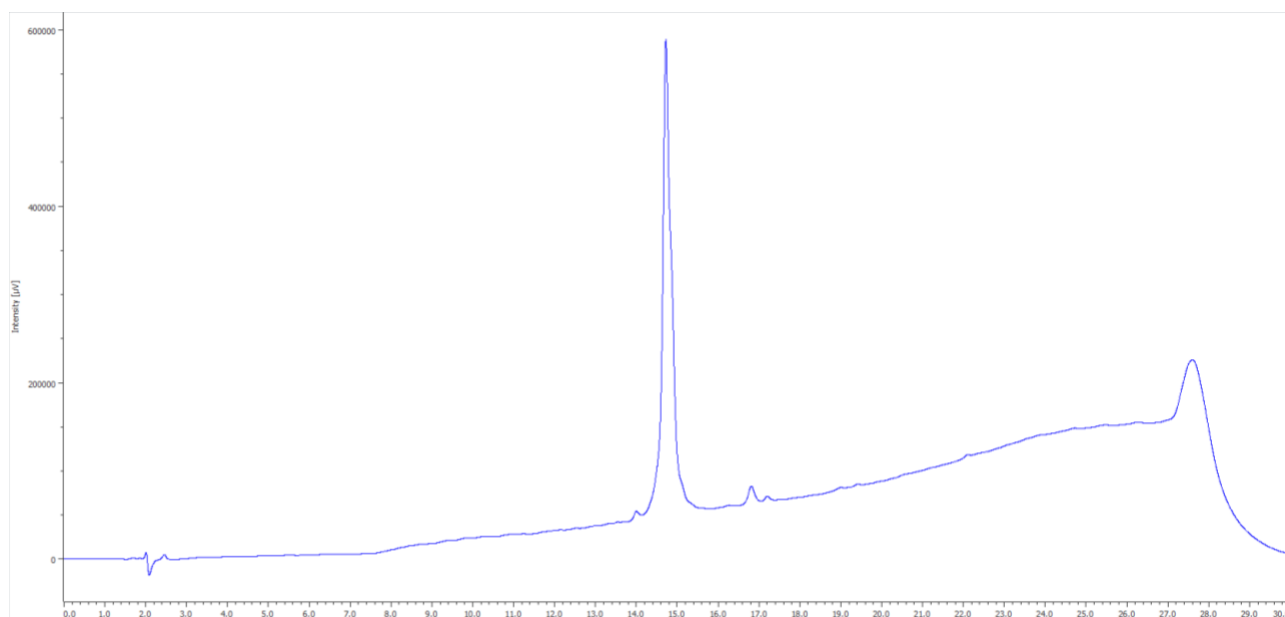

**Figure S3.** Chromatogram of peptide **Pep-cyc3** obtained by an analytical HPLC (Jasco LC-NetII/ADC) equipped with a Phenomenex Kinetex C18 column (150 mm × 4.6 mm, 5 μm, 100 Å), and monitored by UV detection at 220 nm. [linear gradient 10-90% MeCN (0.1% TFA) in H<sub>2</sub>O (0.1% TFA) over 20 min, flow rate of 1 mL/min]. Calculated mass: Found mass: 1978.1719.  $[M+2H]^+/2=990.0878$ ,  $[M+3H]^+/3=660.3942$ .

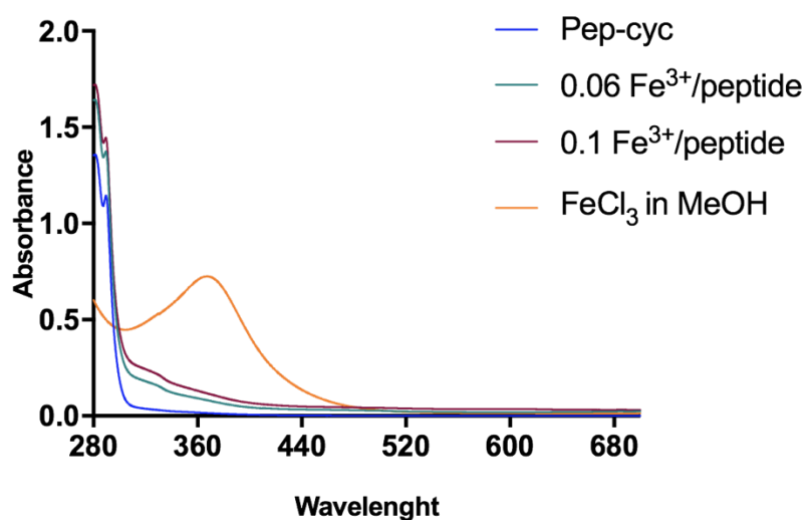

**Figure S4.** UV-vis spectra of Pep-cyc (blue trace), Fe<sup>3+</sup> (orange trace) and Fe<sup>3+</sup>/ligand complex at the ratios of 0.06 and 0.1 (green and purple traces).

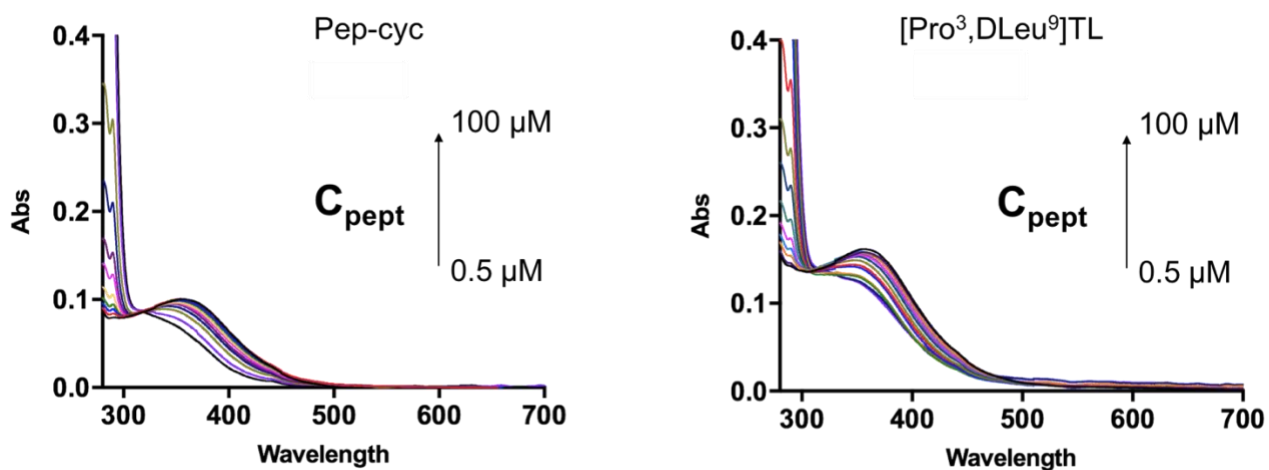

**Figure S5.** UV-vis spectra of Pep-cyc (on the left) and its analogue [Pro<sup>3</sup>,DLeu<sup>9</sup>]TL (on the right) acquired during the titration of Fe<sup>3+</sup> (black line) with increasing peptide concentrations ranging from 0.5 μM to 100 μM.
